# Supplementary material for: Ordered mesoporous boron-doped carbons as metal-free electrocatalysts for the oxygen reduction reaction in alkaline solution
Source: Royal Society of Chemistry journal article supplement (doi:10.1039/c2cp43541a), 2012-11-27
Supplement: c2cp43541a.pdf [file c2cp43541a.pdf]

## Supplementary Information

### Ordered mesoporous boron-doped carbons as metal-free electrocatalyst for oxygen reduction reaction in alkaline solution

Xiangjie Bo and Liping Guo \*

---

\* Corresponding author. Tel.: +86-0431-85099762; Fax: +86-0431-85099762.  
*E-mail address:* guolp078@nenu.edu.cn (L.-P. Guo).

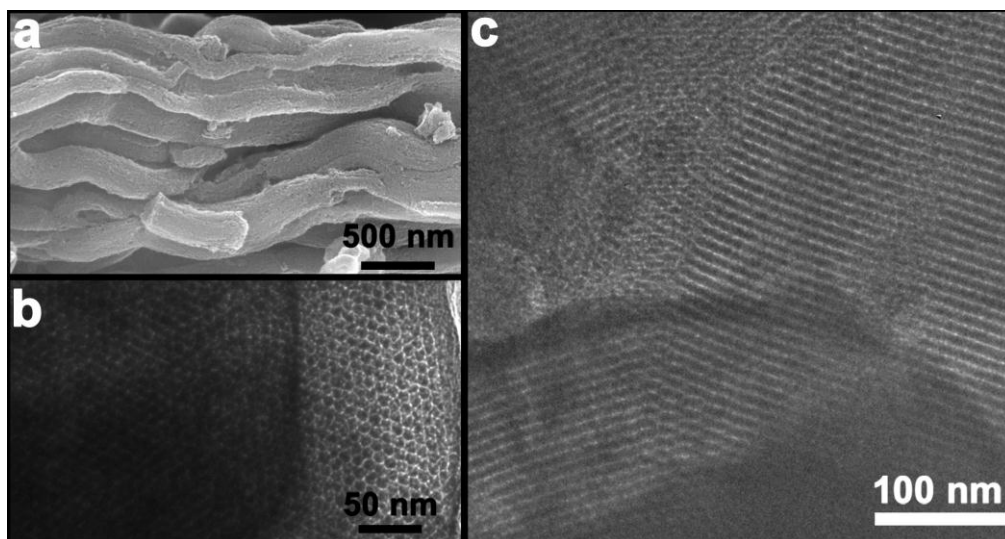

**Fig. S1** (a) SEM image of OMCs. (b) and (c) TEM images of OMCs.

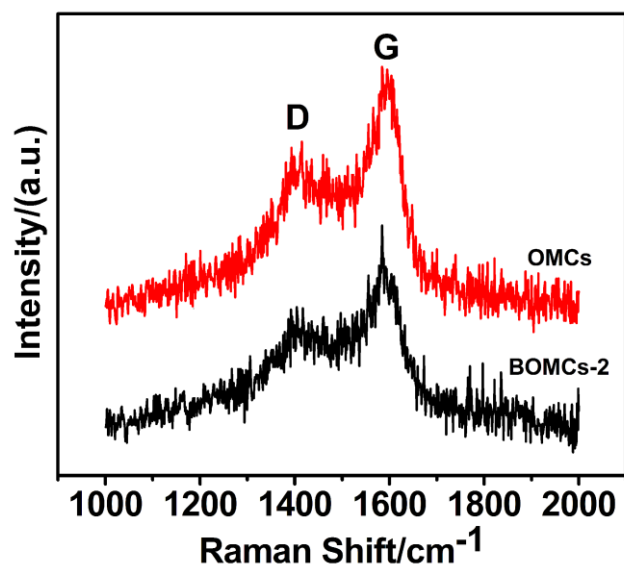

**Fig. S2** Raman spectra of OMCs (red line) and BOMCs-2 (black line).

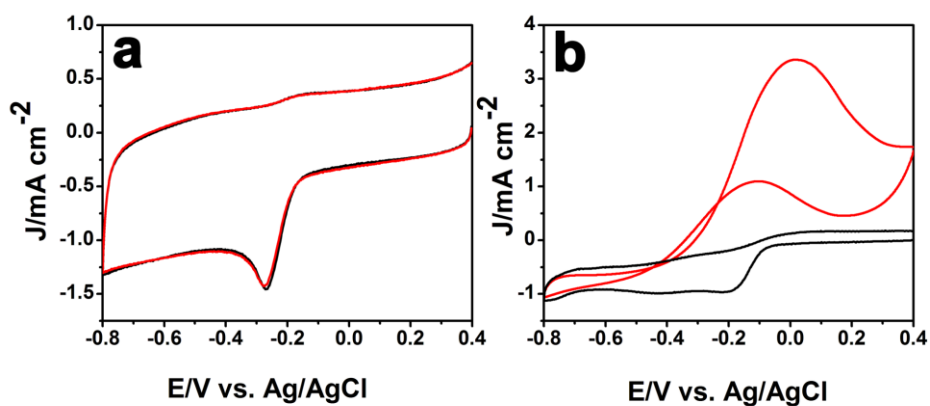

**Fig. S3** (a) CVs of BOMCs-2 in oxygen-saturated 0.1 M KOH (black line) and oxygen-saturated 0.1 M KOH containing 3 M methanol (red line). (b) CVs of Pt/C in oxygen-saturated 0.1 M KOH (black line) and oxygen-saturated 0.1 M KOH containing 3 M methanol (red line).
